# Supplementary figures and images for: Can Bodybuilding Peak Week Manipulations Favorably Affect Muscle Size, Subcutaneous Thickness, and Related Body Composition Variables? A Case Study
Source: MDPI journal article supplement (doi:10.3390/sports10070106), 2022-07-05

OURA RING SLEEP DATA)

SM2: SUBJECT/ATHLETE/AUTHOR PHOTO

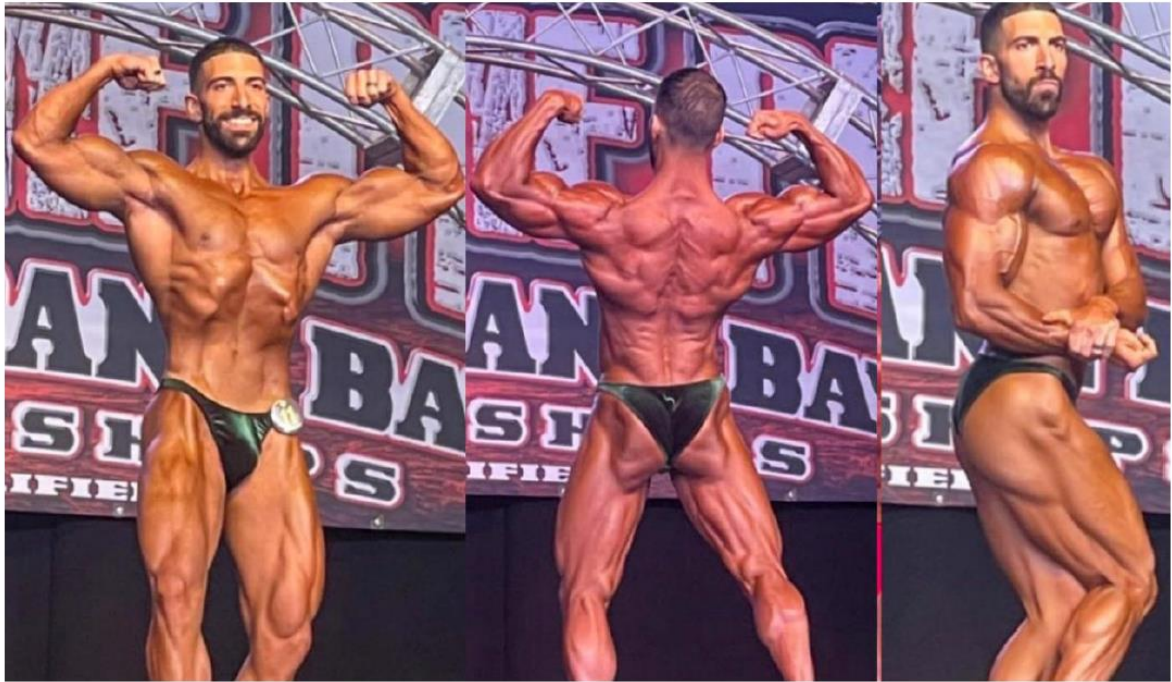

Supplement: s1 [file s1]
